# Supplementary material
Source: HighWire-hosted journal article supplement (https://www.cmajopen.ca/highwire/filestream/89428/field_highwire_adjunct_files/1/open-2022-0103-2-at.pdf)
Supplement: open-2022-0103-2-at.pdf [file open-2022-0103-2-at.pdf]

**Supplemental Table 1. Additional characteristics of patients by length of hospital stay.**

|                                         | Length of stay ≤30 d | Length of stay >30 d | Standardized difference |
|-----------------------------------------|----------------------|----------------------|-------------------------|
| <b>Post-operative complications</b>     |                      |                      |                         |
| Surgical re-exploration, n (%)          | 3 888 (3.8%)         | 601 (24.8%)          | 0.63                    |
| ECMO, n (%)                             | 54 (0.1%)            | 15 (0.6%)            | 0.10                    |
| Surgical site infection, n (%)          | 2 567 (2.5%)         | 870 (35.9%)          | 0.94                    |
| Ventilator associated pneumonia, n (%)  | 491 (0.5%)           | 223 (9.2%)           | 0.42                    |
| Acute kidney injury, n (%)              | 4 555 (4.4%)         | 650 (26.8%)          | 0.65                    |
| Myocardial infarction, n (%)            | 614 (0.6%)           | 82 (3.4%)            | 0.20                    |
| Stroke, n (%)                           | 1 431 (1.4%)         | 409 (16.9%)          | 0.56                    |
| Prolonged mechanical ventilation, n (%) | 2 309 (2.2%)         | 1534 (63.3%)         | 1.71                    |
| <b>Length of stay</b>                   |                      |                      |                         |
| ICU LOS, mean +/- SD, days              | 2.22 (2.42)          | 28.32 (27.90)        | 1.32                    |
| ICU LOS, median +/- IQR, days           | 1 (1-3)              | 22 (10-37)           | 2.18                    |
| <b>30-Day Re-presentation</b>           |                      |                      |                         |
| ICU, n (%)                              | 3 020 (2.9%)         | 225 (9.3%)           | 0.27                    |
| Hospital, n (%)                         | 12 541 (12.2%)       | 701 (28.9%)          | 0.42                    |
| Physician, mean +/- SD, visits          | 2.08 (1.51)          | 1.81 (2.44)          | 0.14                    |
| Physician, median +/- SD, visits        | 2 (1-3)              | 1 (0-3)              | 0.37                    |

Appendix 2, as supplied by the authors. Appendix to: Fottinger A, Eddeen AB, Lee DS, et al. Derivation and validation of pragmatic clinical models to predict hospital length of stay after cardiac surgery in Ontario, Canada: a population-based cohort study. *CMAJ Open* 2023. doi:10.9778/cmajo.2022-0103. Copyright © 2023 The Author(s) or their employer(s). To receive this resource in an accessible format, please contact us at [cmaigroup@cmaj.ca](mailto:cmaigroup@cmaj.ca).

Appendix 2, as supplied by the authors. Appendix to: Fottinger A, Eddeen AB, Lee DS, et al. Derivation and validation of pragmatic clinical models to predict hospital length of stay after cardiac surgery in Ontario, Canada: a population-based cohort study. *CMAJ Open* 2023. doi:10.9778/cmajo.2022-0103. Copyright © 2023 The Author(s) or their employer(s). To receive this resource in an accessible format, please contact us at [cmaigroup@cmaaj.ca](mailto:cmaigroup@cmaaj.ca).
